# Supplementary material for: Functional dissection of Drosophila melanogaster SUUR protein influence on H3K27me3 profile
Source: PubMed Central journal article supplement (PMC5709859; doi:10.1186/s13072-017-0163-z), 2017-12-01

**A** anti-H3K27me3  
Abcam #6002

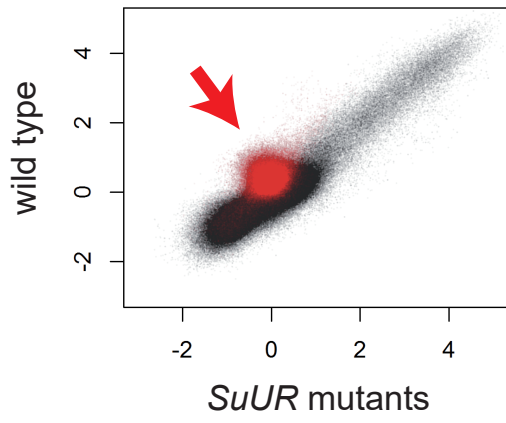

**B** anti-H3K27me3  
CST#9733

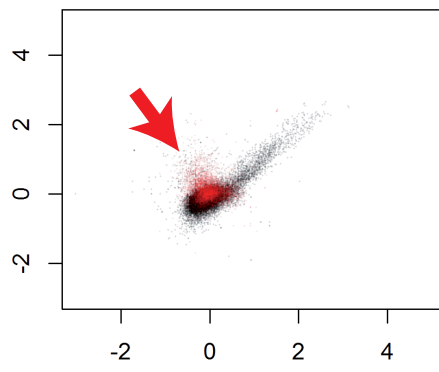

**C** anti-H3K27me2  
Millipore #07-452

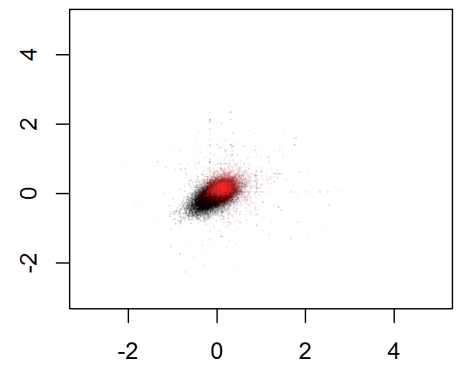

Supplement: 13072_2017_163_MOESM2_ESM.pdf [file 13072_2017_163_MOESM2_ESM.pdf]
