# Supplementary material for: Functional dissection of Drosophila melanogaster SUUR protein influence on H3K27me3 profile
Source: PubMed Central journal article supplement (PMC5709859; doi:10.1186/s13072-017-0163-z), 2017-12-01

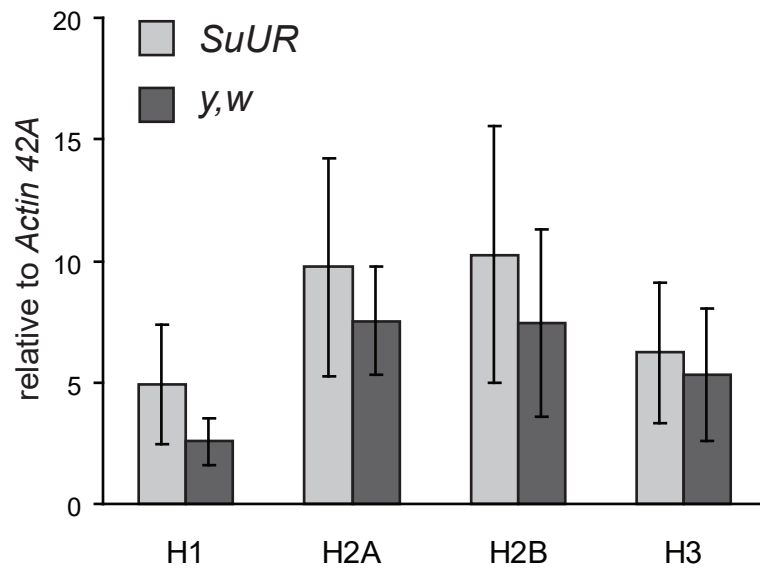

Supplement: 13072_2017_163_MOESM7_ESM.pdf [file 13072_2017_163_MOESM7_ESM.pdf]
